# Supplementary material
Source: PubMed Central journal article supplement (PMC7011641)
Supplement: ONCO-25-e328-s001.pdf [file ONCO-25-e328-s001.pdf]

Supplemental Tables for:  
FDA Approval Summary: Ruxolitinib for Treatment of Steroid-Refractory Acute Graft-Versus-Host Disease

Donna Przepiorka et al.

**Table S1. Efficacy Endpoint Definitions**

| <b>Endpoint</b>                   | <b>Definition</b>                                                                                                                                                                                                                                                                                                                                                                                                                                                                                                                                                   |
|-----------------------------------|---------------------------------------------------------------------------------------------------------------------------------------------------------------------------------------------------------------------------------------------------------------------------------------------------------------------------------------------------------------------------------------------------------------------------------------------------------------------------------------------------------------------------------------------------------------------|
| Complete Response (CR)            | Stage 0 for each organ (skin, liver and GI tract), and no intervening additional therapy                                                                                                                                                                                                                                                                                                                                                                                                                                                                            |
| Very Good Partial Response (VGPR) | Improvement by at least 1 stage in 1 or more organs and <ul style="list-style-type: none"> <li>– Skin: No bullae and no residual erythematous rash involving &lt; 25% of the body surface, and</li> <li>– Liver: Total serum bilirubin concentration &lt; 2 mg/dL or &lt; 25% of baseline at enrollment, and</li> <li>– Gut: Tolerating food or enteral feeding, predominantly formed stools, no overt gastrointestinal bleeding or abdominal cramping, and no more than occasional nausea or vomiting, and</li> <li>– No intervening additional therapy</li> </ul> |
| Partial Response (PR)             | Improvement by at least 1 stage in 1 or more organs without progression in other organs, and no intervening additional therapy                                                                                                                                                                                                                                                                                                                                                                                                                                      |
| Duration of Response              | Interval from the Day-28 response to the day of progression, <sup>a</sup> new systemic therapy <sup>b</sup> for aGVHD or death from any cause                                                                                                                                                                                                                                                                                                                                                                                                                       |
| Durability                        | Interval from the Day-28 response to the day of new therapy <sup>b</sup> for a GVHD or death from any cause                                                                                                                                                                                                                                                                                                                                                                                                                                                         |

<sup>a</sup> Progression is defined as worsening by at least one stage in any organ without improvement in stage in other organs in comparison to the prior response assessment.

<sup>b</sup> New therapy is defined as a new systemic treatment for aGVHD or an increase in the dose of corticosteroids to methylprednisolone 2 mg/kg (+/- 10%) equivalent.

Supplemental Tables for:  
FDA Approval Summary: Ruxolitinib for Treatment of Steroid-Refractory Acute Graft-Versus-Host Disease

Donna Przepiorka et al.

**Table S2. Subpopulation Analysis of Response**

|                             | <b>Patients<br/>N</b> | <b>ORR<br/>n (%)</b> | <b>CR<br/>n (%)</b> |
|-----------------------------|-----------------------|----------------------|---------------------|
| Primary Analysis            | 49                    | 28 (57.1%)           | 15 (30.6%)          |
| Age                         |                       |                      |                     |
| < 65 Years                  | 43                    | 26 (60.5%)           | 14 (32.6%)          |
| ≥ 65 Years                  | 6                     | 2 (33.3%)            | 1 (16.7%)           |
| Sex                         |                       |                      |                     |
| Female                      | 26                    | 14 (53.9%)           | 5 (19.2%)           |
| Male                        | 23                    | 14 (60.9%)           | 10 (43.5%)          |
| Race                        |                       |                      |                     |
| White                       | 45                    | 26 (57.8%)           | 13 (28.9%)          |
| Black or African American   | 2                     | 1 (50.0%)            | 1 (50.0%)           |
| Asian                       | 2                     | 1 (50.0%)            | 1 (50.0%)           |
| Ethnicity                   |                       |                      |                     |
| Hispanic                    | 7                     | 4 (57.1%)            | 3 (42.9%)           |
| Not Hispanic                | 41                    | 24 (58.5%)           | 12 (29.3%)          |
| Not Reported                | 1                     | 0 (0)                | 0 (0)               |
| Donor                       |                       |                      |                     |
| Matched Related             | 17                    | 10 (58.8%)           | 5 (29.4%)           |
| Matched Unrelated           | 20                    | 10 (50.0%)           | 5 (25.0%)           |
| Mismatched                  | 12                    | 8 (66.7%)            | 5 (41.7%)           |
| Baseline GVHD Grade         |                       |                      |                     |
| Grade 2                     | 13                    | 13 (100%)            | 8 (61.5%)           |
| Grade 3                     | 27                    | 11 (40.7%)           | 5 (18.5%)           |
| Grade 4                     | 9                     | 4 (44.4%)            | 2 (22.2%)           |
| Stem Cell Type              |                       |                      |                     |
| Apheresis                   | 39                    | 20 (51.3%)           | 12 (30.8%)          |
| Marrow                      | 9                     | 7 (77.8%)            | 3 (33.3%)           |
| Cord Blood                  | 1                     | 1 (100%)             | 0 (0)               |
| log <sub>10</sub> ST2 ng/mL |                       |                      |                     |
| < 5.5                       | 23                    | 19 (82.6%)           | 12 (52.2%)          |
| ≥ 5.5                       | 24                    | 9 (37.5%)            | 3 (12.5%)           |
| MB Score                    |                       |                      |                     |
| < 0.291                     | 8                     | 7 (87.5%)            | 3 (37.5%)           |
| ≥ 0.291                     | 39                    | 21 (53.9%)           | 12 (30.8%)          |

Abbreviations: CR, complete response; MB, MAGIC biomarker; ORR, overall response that includes CR + VGPR + PR.

Supplemental Tables for:  
FDA Approval Summary: Ruxolitinib for Treatment of Steroid-Refractory Acute Graft-Versus-Host Disease

Donna Przepiorka et al.

**Table S3: Grouped Terms Used for FDA Analyses of Adverse Events**

| <b>Adverse Reaction</b> | <b>MedDRA<sup>a</sup> Level Used to Select Adverse Event Terms</b> |
|-------------------------|--------------------------------------------------------------------|
| Bacterial infection     | HLGT Bacterial infectious disorders                                |
| Diarrhea                | HLT Diarrhoea (excl infective)                                     |
| Dizziness               | SMQ Vestibular disorders                                           |
| Dyspnea                 | HLT Breathing abnormalities                                        |
| Fatigue                 | HLT Asthenic conditions                                            |
| Fungal infection        | HLGT Fungal infectious disorders                                   |
| Gastrointestinal pain   | HLT Gastrointestinal and abdominal pains (excl oral and throat)    |
| Hemorrhage              | SMQ Haemorrhage terms (excl laboratory terms)                      |
| Infections              | HLGT Infections - pathogen unspecified                             |
| Jaundice                | HLT Cholestasis and jaundice                                       |
| Edema                   | HLT Oedema NEC                                                     |
| Rash                    | HLT Rashes, eruptions and exanthems NEC                            |
| Renal injury            | HLT Renal failure and impairment                                   |
| Thrombosis              | SMQ Embolic and thrombotic events                                  |
| Viral infection         | HLGT Viral infectious disorders                                    |

Abbreviations: HLGT, High Level Group Term; HLT High Level Term; SMQ, Standardized MedDRA Query

<sup>a</sup> MedDRA version 19.1 used

Supplemental Tables for:  
FDA Approval Summary: Ruxolitinib for Treatment of Steroid-Refractory Acute Graft-Versus-Host Disease

Donna Przepiorka et al.

**Table S4: Infections As Reported in the Safety Population**

| Infection Group         | Preferred Term                      | All Grades<br>(N=71) |      |
|-------------------------|-------------------------------------|----------------------|------|
|                         |                                     |                      |      |
| Bacterial infection     | Enterococcal infection              | 6                    | (8%) |
|                         | Staphylococcal infection            | 4                    | (6%) |
|                         | Klebsiella bacteraemia              | 2                    | (3%) |
|                         | Pseudomonas infection               | 2                    | (3%) |
|                         | Staphylococcal bacteraemia          | 2                    | (3%) |
|                         | Urinary tract infection bacterial   | 2                    | (3%) |
|                         | Cellulitis                          | 1                    | (1%) |
|                         | Citrobacter infection               | 1                    | (1%) |
|                         | Clostridium difficile infection     | 1                    | (1%) |
|                         | Enterobacter bacteraemia            | 1                    | (1%) |
|                         | Escherichia urinary tract infection | 1                    | (1%) |
|                         | Klebsiella infection                | 1                    | (1%) |
|                         | Otitis media bacterial              | 1                    | (1%) |
|                         | Pneumonia bacterial                 | 1                    | (1%) |
|                         | Pneumonia legionella                | 1                    | (1%) |
|                         | Pseudomonal bacteraemia             | 1                    | (1%) |
|                         | Staphylococcal sepsis               | 1                    | (1%) |
|                         | Streptococcal bacteraemia           | 1                    | (1%) |
| Streptococcal infection | 1                                   | (1%)                 |      |
| Protozoal infection     | Cryptosporidiosis infection         | 1                    | (1%) |
| Fungal infection        | Bronchopulmonary aspergillosis      | 3                    | (4%) |
|                         | Candida infection                   | 2                    | (3%) |
|                         | Oral candidiasis                    | 2                    | (3%) |
|                         | Hepatic infection fungal            | 1                    | (1%) |
|                         | Mycotic endophthalmitis             | 1                    | (1%) |
|                         | Oesophageal candidiasis             | 1                    | (1%) |

Supplemental Tables for:  
FDA Approval Summary: Ruxolitinib for Treatment of Steroid-Refractory Acute Graft-Versus-Host Disease

Donna Przepiorka et al.

**Table S4: Infections As Reported in the Safety Population**

| Infection Group        | Preferred Term                        | All Grades<br>(N=71) |            |
|------------------------|---------------------------------------|----------------------|------------|
|                        |                                       | Count                | Percentage |
|                        | Oral fungal infection                 | 1                    | (1%)       |
|                        | Sinusitis fungal                      | 1                    | (1%)       |
| Infections Unspecified | Sepsis                                | 8                    | (11%)      |
|                        | Urinary tract infection               | 6                    | (8%)       |
|                        | Bacteraemia                           | 5                    | (7%)       |
|                        | Pneumonia                             | 5                    | (7%)       |
|                        | Device related infection              | 4                    | (6%)       |
|                        | Lung infection                        | 4                    | (6%)       |
|                        | Septic shock                          | 4                    | (6%)       |
|                        | Skin infection                        | 3                    | (4%)       |
|                        | Upper respiratory tract infection     | 3                    | (4%)       |
|                        | Cystitis                              | 1                    | (1%)       |
|                        | Enterocolitis infectious              | 1                    | (1%)       |
|                        | Fungaemia                             | 1                    | (1%)       |
|                        | Gastroenteritis                       | 1                    | (1%)       |
|                        | Kidney infection                      | 1                    | (1%)       |
|                        | Peritonitis                           | 1                    | (1%)       |
|                        | Pharyngitis                           | 1                    | (1%)       |
|                        | Sialoadenitis                         | 1                    | (1%)       |
| Sinusitis              | 1                                     | (1%)                 |            |
| Viral infections       | Cytomegalovirus infection             | 9                    | (13%)      |
|                        | BK virus infection                    | 5                    | (7%)       |
|                        | Cytomegalovirus viraemia              | 4                    | (6%)       |
|                        | Adenovirus infection                  | 2                    | (3%)       |
|                        | Corona virus infection                | 2                    | (3%)       |
|                        | Respiratory syncytial virus infection | 2                    | (3%)       |
|                        | Cytomegalovirus chorioretinitis       | 1                    | (1%)       |
|                        | Enterovirus infection                 | 1                    | (1%)       |

Supplemental Tables for:  
FDA Approval Summary: Ruxolitinib for Treatment of Steroid-Refractory Acute Graft-Versus-Host Disease

Donna Przepiorka et al.

**Table S4: Infections As Reported in the Safety Population**

| Infection Group | Preferred Term                 | All Grades<br>(N=71) |            |
|-----------------|--------------------------------|----------------------|------------|
|                 |                                | Count                | Percentage |
|                 | Human herpesvirus 6 infection  | 1                    | (1%)       |
|                 | Influenza                      | 1                    | (1%)       |
|                 | Parainfluenzae virus infection | 1                    | (1%)       |
|                 | Rhinovirus infection           | 1                    | (1%)       |
|                 | Urinary tract infection viral  | 1                    | (1%)       |
